# Supplementary material for: Escherichia coli alcohol dehydrogenase YahK is a protein that binds both iron and zinc
Source: PeerJ. 2024 Sep 10;12:e18040. doi: 10.7717/peerj.18040 (PMC11397123; doi:10.7717/peerj.18040)
Supplement: Supplemental Information 4 [file peerj-12-18040-s004.xlsx]

## Sheet: Sheet1
Figure 1
	Figure1B and C	Fe/protein	STEDV	Zn/protein	STEDV
	YahK-LB	0.260569	0.01125	1.42713	0.0639696
	AdhP-LB	0.0482098	0.00510327	1.45894	0.0412548
	Figure1D	Activity	STEDV
	YahK-LB	3242.85	96.8695
	AdhP-LB	511.438	13.2229
Figure 2
	Figure2B	Fe/protein	STEDV	Zn/protein	STEDV
	M9+none	0.407291	0.0247677	0.253601	0.0397477
	M9+Fe	0.603726	0.0222642	0.147	0.0398437
	M9+Zn	0.0237313	0.00696571	2.00273	0.0366447
	Figure2C	Activity	STEDV
	M9+none	317.32	5.21602
	M9+Fe	165.769	5.68117
	M9+Zn	4437.44	188.598
Figure 3
	ZnSO4 in M9 (µM) Figure 3B and C	Activity	Fe/protein	Zn/protein
	0	323.34	0.43757	0.20981
	0.1	658.44	0.30529	0.37044
	0.6	2151.8	0.14753	0.86275
	2.4	3166.1	0.045631	1.4818
	8	3647.1	0.016516	1.5666
Figure 4
	Figure4B and C	Fe/protein	STEDV	Activity	STEDV
	YahK	0.613134	0.0128497	189.591	2.85314
	C40S	0.545308	0.067694	5.49229	1.09139
	C99S	0.0656909	0.00431951	5.17473	1.66705
	Figure4E and F	Zn/protein	STEDV	Activity	STEDV
	YahK	2.00838	0.0559555	4345.67	216.828
	C40S	1.07169	0.161984	1.94945	0.650748
	C99S	1.97175	0.0255586	16.6371	8.45615
