# Supplementary material for: Escherichia coli alcohol dehydrogenase YahK is a protein that binds both iron and zinc
Source: PeerJ. 2024 Sep 10;12:e18040. doi: 10.7717/peerj.18040 (PMC11397123; doi:10.7717/peerj.18040)
Supplement: Supplemental Information 5 [file peerj-12-18040-s005.xlsx]

## Sheet: Sheet1
	Figure 1
	Figure1B and C	Fe(1)	Fe(2)	Fe(3)	protein concentration(uM)	Fe/protein	Fe/protein (1)	Fe/protein (2)	Fe/protein (3)	Fe/protein	SD
	YahK-LB	9.7601	9.7713	9.7826	37.5	0.260569	0.260269	0.260568	0.260869	0.260569	0.01125
	AdhP-LB	2.1194	2.127	2.1173	44	0.0482098	0.0481682	0.0483409	0.0481205	0.0482098	0.00510327
	Determination of iron content in protein using FerroZine(n = 3)
	Figure1B and C	Zn(1)	Zn(2)	Zn(3)	Zn/protein	SD
	YahK-LB	1.4006	1.5001	1.3807	1.42713	0.0639696
	AdhP-LB	1.46472	1.4151	1.497	1.45894	0.0412548
	Determination of zinc content using ICP-MS(n = 3)
	Figure1D
		△OD340 （1）	△OD340 （2）	△OD340 （3）	protein concentration(uM)				NADPH	STEDV
	YahK-LB	0.623	0.5917	0.6238	3.03826	3296.65	3131.02	3300.88	3242.85	96.8695
	AdhP-LB	0.07728	0.07345	0.07479	2.36309	525.771	499.713	508.83	511.438	13.2229
	The enzyme activity is reflected by the concentration of NADPH produced by 1µM protein within 1 min (µM).(n = 3)
	Figure 2
		Figure2B	Fe/protein 1	Fe/protein 2	Fe/protein 3	AVERAGE	SD
		M9+none	0.380653	0.411597	0.429624	0.407291	0.0247677
		M9+Fe	0.58014	0.60666	0.624377	0.603726	0.0222642
		M9+Zn	0.0232136	0.0170389	0.0309414	0.0237313	0.00696571
			Zn/protein 1	Zn/protein 2	Zn/protein 3	AVERAGE	SD
		M9+none	0.294778	0.250569	0.215456	0.253601	0.0397477
		M9+Fe	0.170889	0.169107	0.101004	0.147	0.0398437
		M9+Zn	2.02438	1.96042	2.02338	2.00273	0.0366447
		Figure2C	NADPH1	NADPH2	NADPH3	AVERAGE	SD
		YahK	314.555	314.069	323.337	317.32	5.21602
		YahK+Fe	172.25	163.412	161.647	165.769	5.68117
		YahK+Zn	4429.82	4629.73	4252.76	4437.44	188.598
	Figure 3
		ZnSO4 in M9 (µM) Figure 3B and C	Activity	Fe/protein	Zn/protein
		0	323.34	0.43757	0.20981
		0.1	658.44	0.30529	0.37044
		0.6	2151.8	0.14753	0.86275
		2.4	3166.1	0.045631	1.4818
		8	3647.1	0.016516	1.5666
	Figure 4
		Figure4B and C	Fe/protein 1	Fe/protein 2	Fe/protein 3	AVERAGE	SD	activity1	activity2	activity3	AVERAGE	SD
		YahK	0.603038	0.627598	0.608765	0.613134	0.0128497	186.87	192.56	189.342	189.591	2.85314
		C40S	0.573503	0.594348	0.468074	0.545308	0.067694	6.3864	4.27611	5.81435	5.49229	1.09139
		C99S	0.0673949	0.0607793	0.0688985	0.0656909	0.00431951	3.9133	7.06467	4.54622	5.17473	1.66705
		Figure4E and F	Zn/protein 1	Zn/protein 2	Zn/protein 3	AVERAGE	SD	activity1	activity2	activity3	AVERAGE	SD
		YahK	1.96727	2.0721	1.98575	2.00838	0.0559555	4318	4144	4575	4345.67	216.828
		C40S	0.944662	1.0163	1.2541	1.07169	0.161984	1.4186	2.67544	1.7543	1.94945	0.650748
		C99S	1.95047	2.0001	1.96467	1.97175	0.0255586	9.4728	14.4737	25.9648	16.6371	8.45615
